# Supplementary material for: Association between the non-HDL-cholesterol to HDL- cholesterol ratio and abdominal aortic aneurysm from a Chinese screening program
Source: PubMed Central journal article supplement (PMC10626699; doi:10.1186/s12944-023-01939-4), 2023-11-06
Supplement: 12944_2023_1939_MOESM2_ESM.pdf [file 12944_2023_1939_MOESM2_ESM.pdf]

# Association between the non-HDL-cholesterol to HDL- cholesterol ratio and abdominal aortic aneurysm from a Chinese screening program

*By* Wenhui Lin

1 **Association between the non-HDL-cholesterol to HDL-**  
2 **cholesterol ratio and abdominal aortic aneurysm from a**  
3 **Chinese screening program**

4

5 **Wenhui Lin<sup>1†</sup>, Songyuan Luo<sup>1†</sup>, Wei Li<sup>2</sup>, Jitao Liu<sup>1</sup>, Ting Zhou<sup>1</sup>, Fan Yang<sup>3</sup>, Dan**  
6 **Zhou<sup>1</sup>, Yuan Liu<sup>1</sup>, Wenhui Huang<sup>1</sup>, Yingqing Feng<sup>4\*</sup>, Jianfang Luo<sup>1\*</sup>**

7 † Coequal contributions was made by these authors, who jointly hold the first authorship.

8 \* Corresponding author

9

10 **Abstract**

11 **Background:** Abdominal aortic aneurysms (AAAs) can result in high mortality upon  
12 rupture but are usually undiagnosed because of the absence of symptoms in the early  
13 stage. Ultrasound screening is regarded as an impactful way to prevent the AAA-related  
14 death but cannot be performed efficiently; therefore, a target population, especially in  
15 Asia, for this procedure is lacking. Additionally, although dyslipidaemia and  
16 atherosclerosis are associated with AAA. However, it remains undetermined whether  
17 the **non-high-density lipoprotein-cholesterol** to **high-density lipoprotein-cholesterol**

18 ratio (NHHR) is associated with AAA. Therefore, this study was aimed at examining  
19 whether NHHR is associated with AAA.

20 **Method:** A total of 9559 participants who underwent AAA screening at Guangdong  
21 Provincial People's Hospital and through screening in two communities in Dongguan,  
22 from June 2019 to June 2021 joined in this screening program. The diagnosis of AAA  
23 was confirmed by the ultrasound examination of the abdominal aorta rather than any  
24 known or suspected AAA. Clinical and laboratory data of participants were collected.  
25 The participants were separated into a normal group and an AAA group according to  
26 the abdominal aortic status. To eliminate confounding factors, a propensity score  
27 matching (PSM) approach was utilized. The independent relationship between NHHR  
28 and AAA was assessed through the utilization of multivariate logistic regression  
29 analysis. In addition, internal consistency was evaluated through subgroup analysis,  
30 which controlled for significant risk factors.

31 **Results:** Of all the participants, 219 (2.29%) participants were diagnosed with AAA.  
32 A significant elevation in NHHR was identified in the AAA group when contrasted with  
33 that in the normal group ( $P < 0.001$ ). As demonstrated by the results of the <sup>15</sup> multivariate  
34 logistic regression analysis, AAA was independently associated with NHHR before  
35 (odds ratio [OR], 1.440,  $P < 0.001$ ) and after PSM (OR, 1.515,  $P < 0.001$ ). Significant

36 extension was observed in the areas under the receiver operating characteristic curves  
37 (AUROCs) of NHHR compared to those of single lipid parameters before and after  
38 PSM. An accordant association between NHHR and AAA in different subgroups was  
39 demonstrated by subgroup analysis.

40 **Conclusion:** In the Chinese population, there is an independent association between  
41 NHHR and AAA. NHHR might be propitious to distinguish individuals with high risk  
42 of AAA.

43 **Keywords:** Non-HDL-C/HDL-C ratio, Abdominal aortic aneurysm, Ultrasound  
44 screening, Chinese population

45

## 46 **Introduction**

47 Abdominal aortic aneurysm (AAA) is an irreversible and parlous disease carrying  
48 a mortality rate of 67-94%, and commonly, symptoms do not manifest prior to  
49 rupture[1]. Four screening programs, which were based on randomized controlled trials  
50 from 1991 to 2004, all indicated a decline in AAA-related mortality[2-5]. Ultrasound  
51 screening is regarded as an impactful way to prevent AAA-related death and AAA  
52 rupture[6]. However, studies have reported that in Western Europe and America, the  
53 prevalence of AAA has decreased to 1.3–1.7%, which influences the effectiveness and

54 cost- effectiveness of screening[7-9]. Therefore, parameters that could identify  
55 individuals at increased risk of AAA, should be explored to enhance the AAA  
56 prevalence in the more targeted screening for AAA[10].

57 AAA is an aortic dilatation of over 3 cm inside the abdominal area[11]. Patients  
58 with AAAs usually suffer from atherosclerosis simultaneously, and the relevance  
59 between peripheral atherosclerosis or coronary heart disease (CAD) and AAA has been  
60 proposed in numerous studies[12-14]. According to a 7-year prospective study,  
61 atherosclerosis risk factors were strongly connected with AAA prevalence[15]. Lately,  
62 there has been an increased focus on elucidating the importance of non-traditional lipid  
63 indicators, such as non-high-density lipoprotein cholesterol (non-HDL-C) and the non-  
64 high-density lipoprotein cholesterol to high-density lipoprotein cholesterol (non-HDL-  
65 C/HDL-C) ratio (NHHR)[16, 17], in predicting atherosclerotic cardiovascular  
66 disease[18-20]. As a novel lipid parameter, NHHR, which consists of atherogenic and  
67 antiatherogenic lipid particles, has been considered as a diagnostic marker for many  
68 dyslipidemia-related diseases, for example diabetes mellitus[21-23], metabolic  
69 syndrome[18] and carotid atherosclerosis[19, 20]. However, studies appraising the  
70 association between NHHR and AAA are limited. The present study was aimed at  
71 exploring whether NHHR was associated with AAA, and increasing the prevalence for

72 AAA in the screening.

73

## 74 **Methods**

### 75 **Study population**

76 The study population comprised 10169 Chinese adults who underwent AAA  
77 screening at Guangdong Provincial People's Hospital or through screening programs  
78 in two communities in Dongguan, China, from June 2019 to June 2021. The diagnosis  
79 of AAA was confirmed by ultrasound examination of the abdominal aorta, rather than  
80 any known or suspected AAA. In this study, the participant selection standard  
81 encompassed (1) any history of malignant tumor, infectious disease, liver disease or  
82 renal disease, (2) blunt traumatic abdominal aortic injury, (3) previous aortic  
83 intervention, and (4) a lack of data on HDL-C and total cholesterol (TC) levels. Figure  
84 I depicts the flowchart for the participant selection standards.

85

### 86 **Definition**

87 In this study, AAA was defined as having an abdominal aortic diameter (AAD) greater  
88 than 30 millimeters<sup>9</sup>[11]. Non-HDL-C was established through computing the numerical  
89 difference between TC (mmol/L) and HDL-C (mmol/L)[24].

90

91 **Measurement and data collection**

92 All study participants had an ultrasound scan, which is recommended for AAA  
93 screening in the latest guidelines[25, 26]. Not only does ultrasound scanning exhibit  
94 high sensitivity (94%-100%) but it also demonstrates high specificity (98%-100%) in  
95 the detection of AAA.[27-31]. Radiologists who were recruited for the screening all  
96 satisfied the undermentioned requirements: 1) Over 5 years of radiological experience  
97 should be possessed 2) abdominal aorta ultrasound scans should have been conducted  
98 at a minimum frequency of once per month over the past 12 months. Before performing  
99 measurements, radiologists must learn the measurement standards for AAA screening  
100 and adhere to these requirements. The ultrasound scans were performed in a plane  
101 perpendicular to the aortic longitudinal axis. Regarding the setting of the caliper,  
102 radiologists were required to measure the abdominal aortic diameter with an outer-to-  
103 outer (OTO) measurement, which was defined as measuring from outer anterior wall to  
104 the outer posterior wall. In addition, the measurement was started from the diaphragm,  
105 and ended at the bifurcation of the aorta. The maximal abdominal aortic diameter was  
106 defined as the largest diameter from the lowest renal artery to the aortic bifurcation in  
107 the transverse plane and the longitudinal plane [32-34].

108 Participants were gauged for weight and height with them donning lightweight  
109 attire and standing barefoot. The participants' information pertaining to their health,  
110 including age, smoking history, and previous medical conditions, was self-reported by  
111 the participants and documented by the researchers. Smoking was regarded as a binary  
112 variable denoting whether individuals had ever smoked (yes/no) in the past. Prior to  
113 blood sample extraction, participants were required to undergo an 8-hour fasting period.  
114 Uric acid (UA), serum creatinine (Cr), <sup>1</sup> low-density lipoprotein cholesterol (LDL-C),  
115 HDL-C, TC and TG were tested with the Hitachi 7600 machine (Kyowa, Japan).  
116 Conventional lipid parameters, comprising <sup>22</sup> TC, TG, HDL-C, and LDL-C, could be  
117 reliably detected using enzymatic methods. HbA1c was tested with an HLC-723 G7  
118 (Tosoh, Japan).

119 Demographics, clinical characteristics, laboratory and ultrasound scan findings were  
120 recorded by 2 researchers independently.

121

## 122 **Propensity score matching analysis**

123 To strengthen the repeatability of the study, propensity score matching (PSM) was  
124 applied to eliminate probable confounders and selection bias of this retrospective  
125 review. The characteristics used to calculate the propensity score were age, BMI, sex,



126 smoking, <sup>10</sup> hypertension, diabetes mellitus (DM), coronary artery disease (CAD),  
127 peripheral artery disease (PAD), stroke, prior usage of angiotensin system inhibitors,  
128 beta-blockers, statins, and metformin. One to-one nearest-neighbor matching was  
129 implemented using a 0.2 caliper. After matching, 2 groups of 219 subjects were  
130 identified. Standardized mean differences (SMDs) were utilized to estimate the  
131 difference between the 2 matched groups. Commonly, it is acceptable to obtain a  
132 maximum SMD of 0.10 or even 0.15.

133

#### 134 **Statistical analysis**

135 Participant characteristics were considered based on the presence or absence of  
136 AAA. Continuous variables <sup>20</sup> are presented, with the mean and standard deviation (SD)  
137 directed to the data that conforms to a normal distribution, and with medians along with  
138 the interquartile range (IQR) when dealing with <sup>11</sup> data that does not follow a normal  
139 distribution. Student's t-test was utilized to conduct the comparisons on data  
140 demonstrating <sup>3</sup> a normal distribution, while the Mann-Whitney U test was employed for  
141 data that did not adhere to normal distribution. Furthermore, in the presentation of  
142 categorical variables, they are depicted either in terms of relative frequencies  
143 (percentages). Subsequently, the comparison of categorical variables involved the

144 application of either the <sup>2</sup> chi-square test or Fisher's exact test. For the sake of estimating  
145 the association between NHHR and AAA, NHHR was categorized into tertiles [low  
146 (<2.50 mmol/L), middle (2.50-3.51 mmol/L), high (>3.51 mmol/L)]. An assessment of  
147 the independent association between NHHR and AAA was performed through the  
148 implementation of logistic regression analysis. As a consequence, this analysis yielded  
149 <sup>8</sup> odds ratios (ORs) along with their corresponding 95% confidence intervals (CIs).  
150 Initially, univariate logistic regression analysis was conducted on all the collected  
151 variables. Multivariate logistic regression analysis was employed for investigating  
152 factors independently linked to the disease, employing <sup>17</sup> variables with a  $P < 0.05$  in the  
153 univariate analysis. Subsequently, three main models were constructed for adjusting the  
154 covariate, namely, <sup>5</sup> Model 1, unadjusted; Model 2, adjusted for age, BMI and sex; and  
155 Model 3, adjusted for age, BMI, sex, smoking, hypertension, DM, CAD, PAD, stroke,  
156 <sup>1</sup> levels of alanine aminotransferase(ALT), aspartate aminotransferase(AST), uric acid,  
157 blood urea nitrogen (BUN), Cr, TG, TC, LDL-C, HBA1C and fasting glucose, and use  
158 of angiotensin system inhibitors, beta-blockers, statins and metformin.

159 In the subgroup analysis, NHHR was probed to determine whether it was  
160 associated with AAA in the several subgroups, which included age, sex, smoking,  
161 hypertension, CAD and previous statin use. In every subgroup, the multiple stepwise

162 logistic regression was implemented.

163       The diagnostic performance of the variables in predicting AAA was assessed  
164 utilizing receiver operating characteristic (ROC) curves. Subsequently, for the purpose  
165 of quantifying and comparing results of the analysis, the area under the curve (AUC)  
166 along with its paired 95% CI was computed. In addition, the Youden index (YI) was  
167 used to determine a cutoff value for NHHR. Based on this cutoff value, the division of  
168 participants into two groups was carried out with the objective of exploring the  
169 connection between NHHR and AAA.

170

## 171 **Results**

### 172 **Baseline characteristics**

173       This study comprised 9559 participants, of whom 6,144 were male (64.3%), and the  
174 average age was  $70.3 \pm 0.1$  years. The total number of 97.7% (9340) and 2.3% (219) of  
175 the participants were distributed in the normal group and AAA group severally (details  
176 in Supplementary Table I). Before matching, the AAA group commonly had a larger  
177 percentage of comorbidities (except for diabetes mellitus). There was no substantial  
178 difference in comorbidities between the normal and AAA groups, after matching. In the  
179 AAA group, NHHR exhibited relatively elevated values compared to the normal group,

180 HDL-C levels demonstrated a decrease<sup>2</sup> in the AAA group compared to the normal group.

181 The baseline characteristics concerning the participants, which were separated by the  
182 abdominal aorta status, are displayed in Table I.

183 To enhance clinical utility, three groups were formed among the participants (low

184 NHHR group: NHHR <2.50; medium NHHR group:  $2.50 \leq \text{NHHR} \leq 3.51$ ; high NHHR

185 group: NHHR >3.51) after dividing NHHR into tertiles. The high NHHR group

186 exhibited a distinct increase in the prevalence of AAA in comparison to the medium

187 NHHR group and low NHHR group (1.0% versus 2.5%<sup>21</sup> versus 3.4%;  $P < 0.001$ ) (Figure

188 II A). The high NHHR group showed a remarkably greater maximum AAD in contrast

189 to both the low NHHR and medium NHHR groups. (19.0 versus 19.4 versus 19.6;

190  $P < 0.001$ ) (Figure II B).

191

#### 192 <sup>4</sup> Univariate and multivariate logistic regression analysis

193 As demonstrated by the findings of univariate logistic regression analysis, NHHR

194 exhibited a substantial association with AAA (OR, 1.391;  $P < 0.001$ ). Other significant

195 parameters comprised age, sex, smoking, hypertension, CAD, stroke, and levels of UA,

196 Cr, BUN, HDL-C and HBAC1. To confirm that no multicollinearity existed among all

197 variables, not only tolerance, but also the variance inflation factor (VIF) were assessed

198 before conducting the multivariate logistic regression analysis with these significant  
199 factors (Supplement. Table II). In this analysis, NHHR was still linked to the prevalence  
200 of AAA (OR, 1.440;  $P<0.001$ ) (Table II). After adjusting for confounders with stepwise  
201 multivariate logistic regression analysis, when considering the low NHHR group as a  
202 reference, it was observed that the high NHHR group exhibited the strongest association  
203 with AAA. (OR, 4.231; 95% CI, (2.754-6.500);  $P<0.001$ ) (Table III).

204

#### 205 **Propensity score matching analysis**

206 One-to-one nearest-neighbor matching was utilized to eliminate the possible  
207 confounding factors accordingly. Two groups, each consisting of 219 participants, were  
208 formed. After matching, NHHR in the AAA group still exceeded that in the normal  
209 group. In the meanwhile, the AAA group exhibited a reduced HDL-C level in  
210 comparison to the normal group. (Table I). Furthermore, the high NHHR group  
211 possessed a considerably highest prevalence of AAA (32.2% versus 57.5% versus  
212 60.3%;  $P<0.01$ ) and maximal AAD (26.1 versus 30.7 versus 31.4;  $P<0.01$ ) than the low  
213 NHHR group (Figure II C, D). Subsequently, logistic regression analyses, both  
214 univariate and multivariate, were conducted in the matched cohort. (Table II). NHHR,  
215 which was revealed by the univariate logistic regression analysis, was in association

216 with the prevalence of AAA (odds ratio [OR], 1.520;  $P < 0.001$ ). Moreover, NHHR,  
217 which was proved by the multivariate logistic regression analysis, might be linked to  
218 AAA prevalence independently (OR, 1.515;  $P < 0.001$ ).

219

#### 220 Subgroups analyses

221 To validate the internal stability of the study, stratified analyses to probe the odds  
222 of AAA with changes in NHHR in different subgroups were performed. In consequence,  
223 NHHR remained substantially tied to the prevalence of AAA when considering all  
224 stratified subgroups ( $P < 0.001$ ), which was comprised of age, sex, smoking,  
225 hypertension, CAD and previous statin use. (figure III).

226

#### 227 Receiver operating characteristic curve analysis

228 With the intention of calculating the predictive accuracy for NHHR, the ROC  
229 curve analysis was employed in this study. A comparison of HDL-C (AUC, 0.636; 95%  
230 CI, 0.601-0.671), non-HDL-C (AUC, 0.531; 95% CI, 0.494-0.567), TC (AUC, 0.520;  
231 95% CI, 0.482-0.558) and NHHR (AUC, 0.646; 95% CI, 0.615-0.677) indicated that  
232 NHHR had the best predictive value. In addition, to enhance the diagnostic efficiency  
233 of NHHR, it was combined with the latest guideline-recommended risk determinants

234 of AAA, which was comprised of age, gender, smoking and CAD, to form the Model  
235 a[35]. As a result, a favorable predictive performance was exhibited by the Model a<sup>18</sup>  
236 (AUC, 0.764; 95% CI, 0.738-0.790) (Figure IV A). Following PSM, ROC curve  
237 analysis was implemented, without certain confounding factors. Once more, the  
238 superior predictive value for AAA was demonstrated by NHHR (AUC, 0.653; 95% CI,  
239 0.602-0.704) in comparison with non-HDL-C (AUC, 0.598; 95% CI, 0.544-0.651), TC<sup>1</sup>  
240 (AUC, 0.562; 95% CI, 0.508-0.616) and HDL-C (AUC, 0.560; 95% CI, 0.506-0.614)<sup>16</sup>  
241 as well (Figure IV B). According to the YI, NHHR held the cutoff values, which were  
242 2.83 before PSM and 2.75 after PSM. Based on these cutoff values, NHHR was divided  
243 into two groups [before PSM: low (<2.83), high (>2.83); after PSM: low (<2.75), high  
244 (>2.75)]. In contrast to the low NHHR group, both before and after PSM, the high  
245 NHHR group demonstrated a higher prevalence of AAA (Supplement Figure I).

246

## 247 Discussion

248 NHHR is a satisfactory diagnostic biomarker for AAA according to this study. As  
249 a result, AAA was found to be strongly associated with a high NHHR, which played a  
250 more important role than traditional lipid parameters in AAA screening among a  
251 Chinese population.

252 Among the numerous atherogenic lipid parameters presented, NHHR integrated all  
253 atherogenic cholesterols, including <sup>7</sup>very low density lipoprotein cholesterol (VLDL-C),  
254 LDL-C, intermediate density lipoprotein cholesterol (IDL-C) and lipoprotein (a), in  
255 addition to HDL-C, which is an anti-atherogenic factor.[24, 36, 37] Lately, numerous  
256 researches has demonstrated a connection between NHHR and various dyslipidemia-  
257 related diseases, such as metabolic syndrome[18], liver disease[38], coronary  
258 atherosclerosis[39] and carotid atherosclerosis[20]. Moreover, dyslipidemia, especially  
259 the atherogenic dyslipidemia, affects the formation and progression of AAA[15, 40].  
260 Iribarren and his colleagues considered that, when the levels of cholesterol exceed 240  
261 mg/dl, it was in significant association with AAA (OR:2.82)[41]. As per the literature  
262 suggests,, <sup>4</sup>an association was observed between the presence of AAA and HDL-C levels  
263 (MD, -0.15 mmol/L)[42]. Yasuhiko K et al. found that, in contrast to subjects in the  
264 lowest quintile of plasma lipoprotein(a), the individuals in the highest quintile exhibited  
265 a remarkable elevation on the subject of prevalence of AAA. (HR:1.57; 95% CI:1.19-  
266 2.08) through follow-up[43]. Nevertheless, there is a paucity of recent studies that have  
267 focused on the correlation between AAA and NHHR, which includes various  
268 atherogenic and antiatherogenic lipid particles. This study corroborated previous  
269 studies validated the correlation between HDL-C with AAA, as well as suggested



270 NHHR could have a significant association with the prevalence of AAA.

271 However, the potential mechanism leading to NHHR induced prevalence of AAA  
272 was not fully expounded, and the damage of the atherogenic lipid particles to the aortic  
273 wall was only partly revealed. While it was documented that there is a notable  
274 association between AAA and atherosclerosis[15], it's an oversimplification to regard  
275 AAA merely as a upshot of advanced atherosclerosis[44]. The pathophysiological  
276 process is complicated and elusive and comprises three pivotal factors: proteolysis,  
277 smooth muscle cell apoptosis and inflammation[45]. A cohort study demonstrated a link  
278 between elevated LDL-C concentrations and matrix metalloproteinase-9 (MMP-9)  
279 allele[46]; in addition, the cholesterol metabolite, hydroxycholesterol (27-OHC), could  
280 increase MMP9 at the mRNA level[47]. Yin J et al. reported that cholesterol oxides  
281 might be able to trigger apoptosis in vascular smooth muscle cells based on animal  
282 experiments[48]. The intracellular redox system and activation of proinflammatory  
283 genes seemed to be changed by Lp(a), which led to the chronic inflammation in the  
284 aortic wall by means of its oxidized phospholipid content[49, 50]. Similarly, studies  
285 revealed that LDL-C could induce inflammation as well[51], and that modified LDL  
286 could lead to the NLRP3 inflammasome priming and activation in macrophages[52], of  
287 which affect formation of AAA[53]. Non-HDL-C, that is abundant and included more

288 constituents than other lipoprotein particles, comprised all the morbidic lipoproteins  
289 mentioned above. Apart from these effects, NHHR is adjusted by HDL-C, which exerts  
290 anti-inflammatory effects[54].

291 This study also verified that the association of NHHR with AAA existed in different  
292 age, sex, smoking, hypertension and CAD conditions, although are were all the risk  
293 factors of AAA[35]. The diagnostic value of NHHR is enhanced by its universality,  
294 especially in the widespread AAA screening. Owing to intact AAAs, which are  
295 commonly asymptomatic, an AAA screening program with ultrasonography  
296 demonstrated timely diagnosis of AAAs and reduced AAA-related mortality[55].

297 Although <sup>14</sup> the US Preventive Services Task Force have advocated a single AAA  
298 ultrasound screening for male individuals between 65 and 75 years old that have a  
299 smoking history[56], AAA screening is prone to trigger overdiagnosis. Therefore,  
300 NHHR is anticipated to assist in identifying high-risk AAA individuals, while  
301 improving screening diagnostic accuracy, thus preventing overdiagnosis during AAA  
302 ultrasound screening.

303

#### 304 **Strengths and limitations**

305 There are a few limitations to be acknowledged in the current research. First, due to

306 its cross-sectional nature, this study might be affected by selection bias.. However, to  
307 minimize potential bias in the study, both PSM and multivariate logistic regression  
308 analyses were employed. Additionally, this study could not establish causative links.  
309 Second, only once was the lipid profile evaluated and noted. A lack of reduplicated  
310 measurement of the lipid profile could lead to the influence of acute stress and  
311 occasionality. Third, although we have already supplemented some of the patient's  
312 medication information, there was no detailed information about previous use of drugs,  
313 including specific lipid-lowering medications, dosing frequency, and duration of  
314 medication use. Therefore the influence of drugs, such as stains, could not be adjusted  
315 accurately. Finally, this study was only consisted of 219 AAA patients. However, this  
316 was a persistent study with durative AAA screening in the hospital and communities.  
317 In prospective research, we intend to prioritize exploring the diagnostic significance  
318 and prognostic assessment of NHHR.

319

### 320 **Conclusion**

321 In addition to the traditionally pivotal lipid parameters, NHHR was in association with  
322 AAA independently. The association existed in different age, sex, smoking,  
323 hypertension and coronary arterial disease conditions. Clinicians could utilize NHHR

324 to assist in identifying high-risk AAA individuals, and improve efficiency of screening,  
325 thus preventing overdiagnosis during AAA ultrasound screening.

326

327 **Declarations**

328 **Authors contributions**

329 L.J.F and F.Y.Q proposed the design of the study and provided comprehensive guidance throughout  
330 the entire process; L.W.H. finished the principal manuscript text, L.S.Y. was in charge of collecting  
331 data, L.W. preside over data quality monitoring, L.J.T., Z.T. and Y.F. contributed to analyzing and  
332 interpreting the data, and L.Y. and H.W.H. engaged in the proofreading the manuscript. The  
333 submitted version was approved by all the authors. Personal responsibility for their individual  
334 contributions has been committed to by the authors.

335

336 **Ethics approval and consent to participate**

337 Authorization for the <sup>3</sup>research was furnished by the Ethics Committee of Guangdong Provincial  
338 People's Hospital (Approval No. GDREC2018215H(R3)). Owing to its retrospective nature,  
339 informed consent was waived.

340

341 **Availability of data and materials**

342 Provided there is a valid and reasonable request made for the information derived from this research,

343 it can be obtained from the primary or corresponding author.

344

345 **Competing interests**

346 No conflicts of interest are announced by the authors.

347

348 **Funding**

349 Financial backing for <sup>12</sup>the research, writing, and publication of this article was recognized by the

350 author(s), including the <sup>23</sup>National Natural Science Foundation of China (82200519); <sup>6</sup>Natural Science

351 Foundation of Guangdong Province, China (2022A1515010897) and Medical Scientific Research

352 Foundation of Guangdong Province, China (A2021348). The investigation's structure, data

353 gathering, analysis, and the interpretation of results were not influenced by the funding entities.

354

355 **Acknowledgements**

356 The authors acknowledge the expert language assistance of Dr. Jiahui Li.

357

358

# Association between the non-HDL-cholesterol to HDL-cholesterol ratio and abdominal aortic aneurysm from a Chinese screening program

---

ORIGINALITY REPORT

---

8%

SIMILARITY INDEX

---

## PRIMARY SOURCES

---

- |   |                                                                                                                                                                                                                                                                           |                 |
|---|---------------------------------------------------------------------------------------------------------------------------------------------------------------------------------------------------------------------------------------------------------------------------|-----------------|
| 1 | <a href="http://lipidworld.biomedcentral.com">lipidworld.biomedcentral.com</a><br>Internet                                                                                                                                                                                | 65 words — 2%   |
| 2 | <a href="http://worldwidescience.org">worldwidescience.org</a><br>Internet                                                                                                                                                                                                | 29 words — 1%   |
| 3 | <a href="http://www.frontiersin.org">www.frontiersin.org</a><br>Internet                                                                                                                                                                                                  | 26 words — 1%   |
| 4 | <a href="http://www.science.gov">www.science.gov</a><br>Internet                                                                                                                                                                                                          | 25 words — 1%   |
| 5 | Yasuhiko Takegami, Taisuke Seki, Yusuke Osawa, Kazuya Makida et al. "A preliminary examination of the association between locomotive syndrome and circulating miRNA-199 in community-dwelling people: The Yakumo study", Journal of Orthopaedic Science, 2021<br>Crossref | 19 words — < 1% |
| 6 | <a href="http://journals.lww.com">journals.lww.com</a><br>Internet                                                                                                                                                                                                        | 17 words — < 1% |
| 7 | Constantine E. Kosmas, Maria D. Bousvarou, Evangelia J. Papakonstantinou, Donatos Tsamoulis et al. "Novel Pharmacological Therapies for the                                                                                                                               | 16 words — < 1% |

Management of Hyperlipoproteinemia(a)", International  
Journal of Molecular Sciences, 2023

Crossref

- 
- 8 [www.cdc.gov](http://www.cdc.gov) 15 words — < 1%  
Internet
- 
- 9 [www.foodandnutritionresearch.net](http://www.foodandnutritionresearch.net) 15 words — < 1%  
Internet
- 
- 10 [phc.herdin.ph](http://phc.herdin.ph) 12 words — < 1%  
Internet
- 
- 11 [www.researchsquare.com](http://www.researchsquare.com) 12 words — < 1%  
Internet
- 
- 12 Abeer Y Ibrahim, Eman R Youness, Manal G Mahmoud, Mohsen S Asker, Samah A El-Newary. " Acidic Exopolysaccharide Produced from Marine 3MS 2017 for the Protection and Treatment of Breast Cancer ", Breast Cancer: Basic and Clinical Research, 2020 11 words — < 1%  
Crossref
- 
- 13 [bmcgeriatr.biomedcentral.com](http://bmcgeriatr.biomedcentral.com) 11 words — < 1%  
Internet
- 
- 14 Muriel Sprynger, Michel Willems, Hendrik Van Damme, Benny Drieghe, J. C. Wautrecht, Marie Moonen. "Screening Program of Abdominal Aortic Aneurysm", Angiology, 2019 9 words — < 1%  
Crossref
- 
- 15 [www.researchgate.net](http://www.researchgate.net) 9 words — < 1%  
Internet
- 
- 16 Hui-Wen Zhang, Xi Zhao, Yan Zhang, Sha Li et al. "ApoB is superior to LDL-C or non-HDL-C as a lipid 8 words — < 1%

marker for predicting the presence and severity of atherosclerosis in female patients with myocardial infarction", Hellenic Journal of Cardiology, 2017

Crossref

---

17 Xinyu ZHANG, Lei ZHANG. "Risk prediction of sleep disturbance in clinical nurses: a nomogram and artificial neural network model", Research Square Platform LLC, 2022 8 words — < 1%  
Crossref Posted Content

---

18 [metabolomics.se](https://metabolomics.se) 8 words — < 1%  
Internet

---

19 [pubmed.ncbi.nlm.nih.gov](https://pubmed.ncbi.nlm.nih.gov) 8 words — < 1%  
Internet

---

20 [www.besjournal.com](http://www.besjournal.com) 8 words — < 1%  
Internet

---

21 [www.dovepress.com](http://www.dovepress.com) 8 words — < 1%  
Internet

---

22 Z. Reiner, A. L. Catapano, G. De Backer, I. Graham et al. "ESC/EAS Guidelines for the management of dyslipidaemias: The Task Force for the management of dyslipidaemias of the European Society of Cardiology (ESC) and the European Atherosclerosis Society (EAS)", European Heart Journal, 2011 7 words — < 1%  
Crossref

---

23 Jun Xiao, Ziting Gao, Hongye Wei, Yajing Wei, Ziyi Qiu, Wuqing Huang. "Combination of QTL and GWAS to uncover the role of phosphodiesterases in ischemic heart disease", Cold Spring Harbor Laboratory, 2023 6 words — < 1%  
Crossref Posted Content



---

EXCLUDE QUOTES      OFF

EXCLUDE BIBLIOGRAPHY   OFF

EXCLUDE SOURCES      OFF

EXCLUDE MATCHES      OFF
