# Supplementary material for: Association between the non-HDL-cholesterol to HDL- cholesterol ratio and abdominal aortic aneurysm from a Chinese screening program
Source: PubMed Central journal article supplement (PMC10626699; doi:10.1186/s12944-023-01939-4), 2023-11-06
Supplement: 12944_2023_1939_MOESM3_ESM.pdf [file 12944_2023_1939_MOESM3_ESM.pdf]

This document certifies that the manuscript

Association between the non-HDL-cholesterol to HDL- cholesterol ratio with  
Abdominal Aortic Aneurysm from a Chinese Screening program

prepared by the authors

Wenhui Lin, Songyuan Luo, Wei Li, Jitao Liu, Ting Zhou, Fan Yang, Dan Zhou, Yuan Liu,  
Wenhui Huang, Yingqing Feng, Jianfang Luo

was edited for proper English language, grammar, punctuation, spelling, and overall style  
by one or more of the highly qualified native English speaking editors at SNAS.

This certificate was issued on **September 22, 2023** and may be verified  
on the [SNAS website](#) using the verification code **DB60-000C-D525-38C8-CB69** .

Neither the research content nor the authors' intentions were altered in any way during the editing process. Documents receiving this certification should be English-ready for publication; however, the author has the ability to accept or reject our suggestions and changes. To verify the final

SNAS edited version, please visit our verification page at [secure.authorservices.springernature.com/certificate/verify](https://secure.authorservices.springernature.com/certificate/verify).

If you have any questions or concerns about this edited document, please contact SNAS at [support@as.springernature.com](mailto:support@as.springernature.com).
